# Supplementary material for: Electron compensation in p-type 3DOM NiO by Sn doping for enhanced formaldehyde sensing performance
Source: Royal Society of Chemistry journal article supplement (doi:10.1039/c7tc00226b), 2017-01-01
Supplement: c7tc00226b1.pdf [file c7tc00226b1.pdf]

## Electronic Supplementary Information

### **Electron Compensation in p-type 3DOM NiO by Sn Doping for Enhanced Formaldehyde Sensing Performance**

*Zhihua Wang, Heng Zhou, Dongmei Han, Fubo Gu\**

State Key Laboratory of Chemical Resource Engineering, Beijing University of Chemical  
Technology, Beijing 100029, China

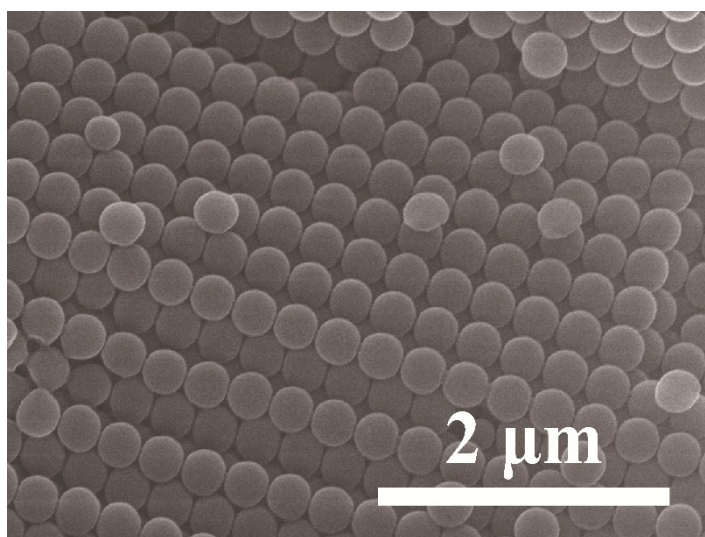

**Fig.S1** SEM of well-arrayed template PMMA microspheres.

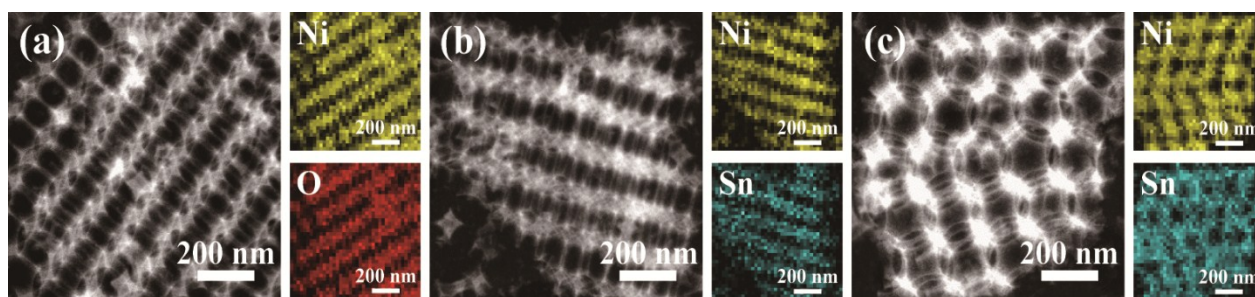

**Fig.S2** Elemental mappings of the 3DOM samples obtained by STEM-EDS: (a) images of NiO; (b) images of NiO/4%Sn; and (c) images of NiO/10%Sn.

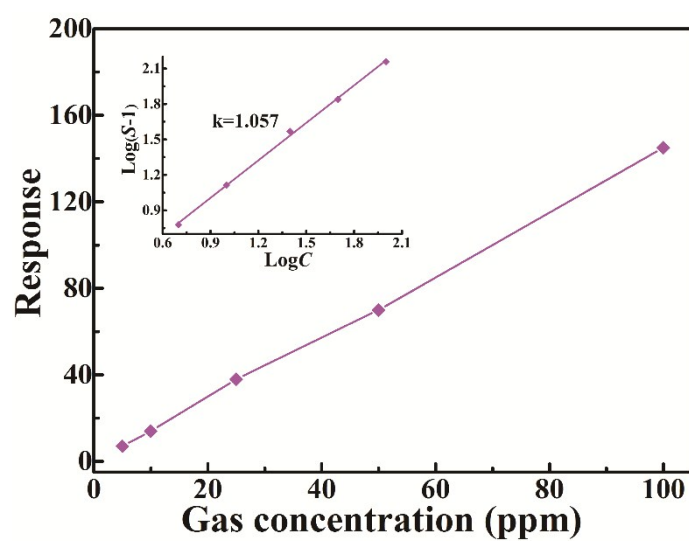

**Fig.S3** Response of 3DOM NiO/10%Sn to HCHO concentration at the optimum working temperature (225 °C), inset: the corresponding  $\log(S-1)$  versus  $\log C_g$  curves.

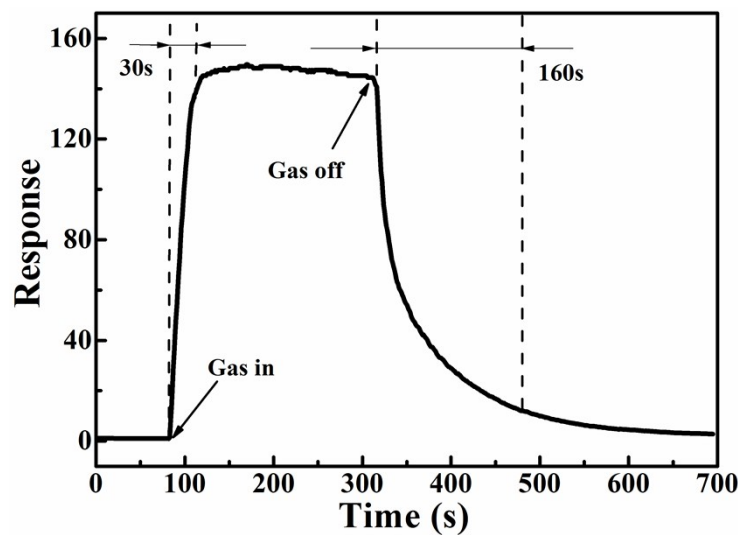

**Fig.S4** Gas response-recovery curves of the 3DOM NiO/10%Sn.

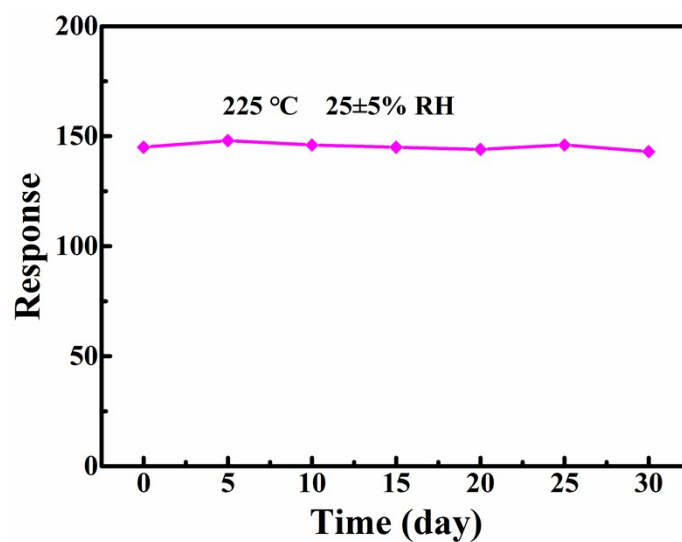

**Fig.S5** Sensing stability of 3DOM NiO/10%Sn for nearly one month.

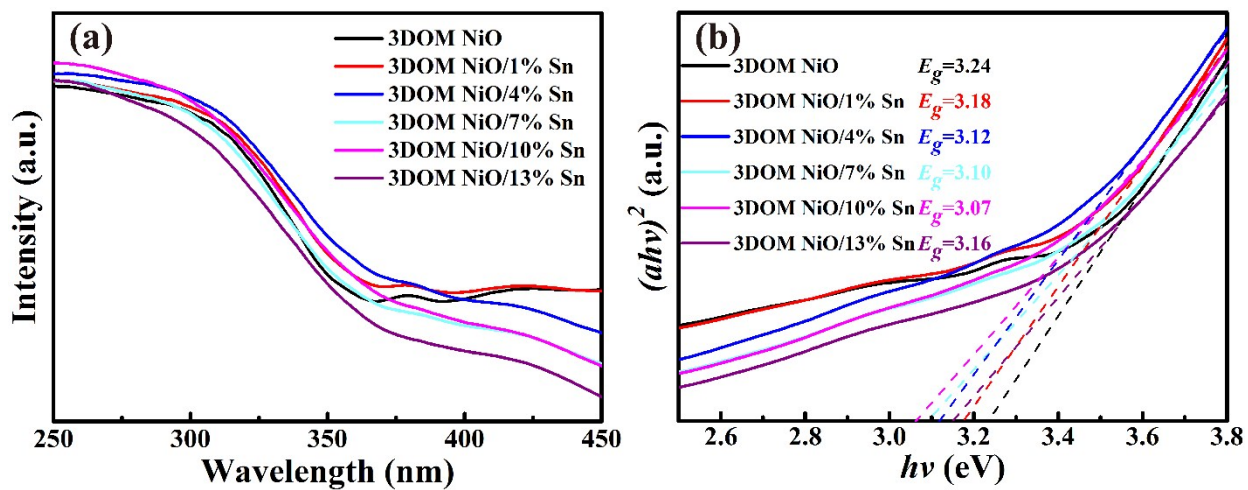

**Fig.S6** The diffuse reflectance spectra and (b) the plots of  $(ahv)^2$  versus photon energy  $h\nu$  of the 3DOM samples.
